# Supplementary material
Source: Springer Nature journal article supplement (https://www.springermedizin.de/resource/supplementary/13024_2012_378_MOESM4_ESM.pdf/9643836)

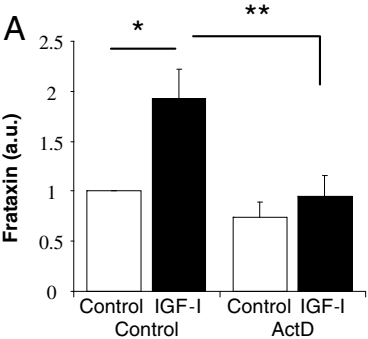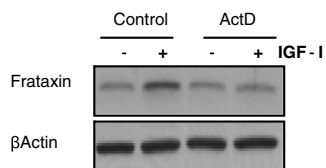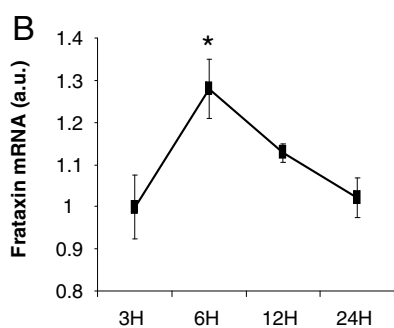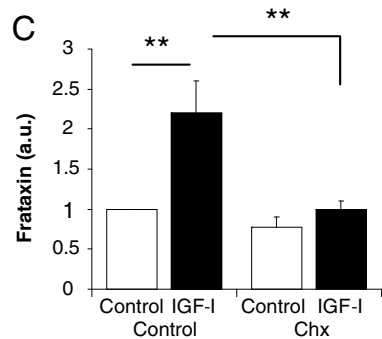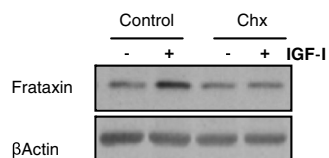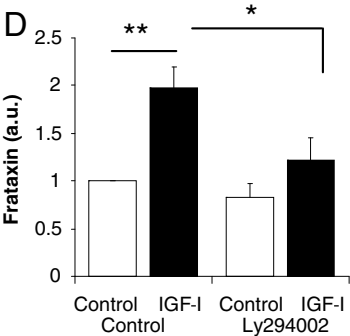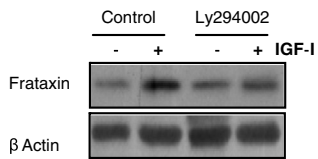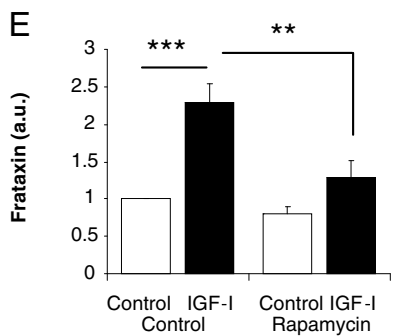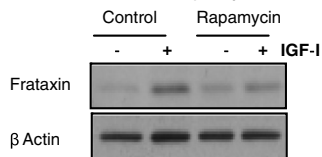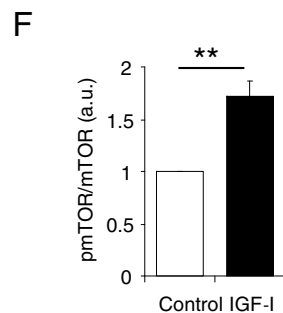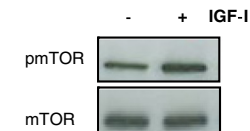

Supplement: MOESM4 [file 9643836]
